# Supplementary material
Source: PubMed Central journal article supplement (PMC3032015)
Supplement: NIHMS237536-supplement-Supplementary_Data.pdf [file NIHMS237536-supplement-Supplementary_Data.pdf]

| HA # for one Gd attached | HA unit MW | Gd MW | Gd-DTPA-EDA MW | Gd% weight |
|--------------------------|------------|-------|----------------|------------|
| 1                        | 384        | 157   | 650            | 0.15       |
| 2                        | 768        | 157   | 650            | 0.11       |
| 3                        | 1152       | 157   | 650            | 0.09       |
| 4                        | 1536       | 157   | 650            | 0.07       |
| 5                        | 1920       | 157   | 650            | 0.06       |
| 6                        | 2304       | 157   | 650            | 0.05       |
| 7                        | 2688       | 157   | 650            | 0.05       |

16kDa HA # of units =  $16k/384 = 42$   
 one Gd in every six HA total Gd = 7 units  
 final MW =  $35*384 + 7*(384+650) = 20.7 \text{ kDa}$   
 74 kDa HA # of units =  $74k/384 = 193$   
 one Gd in every six HA total Gd = 32 units  
 final MW =  $161*384 + 32*(384+650) = 95 \text{ kDa}$

One in seven  
 16 kDa  
 final MW =  $36*384 + 6*(384+650) = 20 \text{ kDa}$   
 74 kDa  
 final MW =  $165*384 + 28*(384+650) = 92 \text{ kDa}$
